# Supplementary material for: Consonant aspiration in Mandarin-speaking children: a developmental perspective from perception and production
Source: Front Pediatr. 2025 Jan 7;12:1465454. doi: 10.3389/fped.2024.1465454 (PMC11776868; doi:10.3389/fped.2024.1465454)
Supplement: Supplementary file 1 [file Table1.xlsx]

## Sheet: Sheet1
Condition	Category_IPA	Category_PinYin	Target Consonant_IPA	Target Consonant_PinYin	Aspiration	Place of Articulation	Manner of Articulation	Stimuli_Chinese	Stimuli_English	Audio Code	Target_PinYin	Disturb_PinYin
trial	trial	trial	N/A	N/A	N/A	N/A	N/A	哪一个是划	Which one is "row" (as in rowing a boat)	M-test1	hua2 ("row" as in rowing a boat)	hua1 ("flower")
trial	trial	trial	N/A	N/A	N/A	N/A	N/A	哪一个是碗	Which one is "bowl"	F-test2	wan3 ("bowl")	san3 ("umbrella")
Quiet	ʦ/ʦh	z/c	ʦh	c	1	Blade-alveolar	Affricate	哪一个是草	Which one is "grass"	M-5-2-19	cao3 ("grass")	zao3 ("jujube")
Quiet	tɕ/tɕh	j/q	tɕ	j	0	Dorso-palatal	Affricate	哪一个是举	Which one is "raise"	F-4-1-14	ju3 ("raise")	qu3 ("to pick up")
Quiet	p/ph	b/p	ph	p	1	Bilabial	Stop	哪一个是牌	Which one is "card"	M-1-2-3	pai2 ("card")	bai2 ("white")
Quiet	k/kh	g/k	k	g	0	Velar	Stop	哪一个是菇	Which one is "mushroom"	F-3-1-10	gu1 ("mushroom")	ku1 ("to cry")
Quiet	ʦ/ʦh	z/c	ʦh	c	1	Blade-alveolar	Affricate	哪一个是刺	Which one is "thorn"	M-5-1-17	ci4 ("thorn")	zi4 ("character")
Quiet	ʦ/ʦh	z/c	ʦ	z	0	Blade-alveolar	Affricate	哪一个是扎	Which one is "prick"	F-5-1-18	za1 ("prick")	ca1 ("to wipe")
Quiet	t/th	d/t	th	t	1	Apico-alveolar	Stop	哪一个是碳	Which one is "carbon"	M-2-2-7	tan4 ("carbon")	dan4 ("egg")
Quiet	ʈʂ/ʈʂh	zh/ch	ʈʂ	zh	0	Blade-palatal	Affricate	哪一个是炸	Which one is "fry" (as in fried chicken)	F-6-1-22	zha2 ("fry" as in fried chicken)	cha2 ("tea")
Quiet	p/ph	b/p	ph	p	1	Bilabial	Stop	哪一个是趴	Which one is "lie flat"	M-1-1-1	pa1 ("lie flat")	ba1 ("eight")
Quiet	ʦ/ʦh	z/c	ʦ	z	0	Blade-alveolar	Affricate	哪一个是坐	Which one is "sit"	F-5-2-20	zuo4 ("sit")	cuo4 ("wrong")
Quiet	k/kh	g/k	kh	k	1	Velar	Stop	哪一个是夸	Which one is "praise"	M-3-2-11	kua1 ("praise")	gua1 ("melon")
Quiet	tɕ/tɕh	j/q	tɕh	q	1	Dorso-palatal	Affricate	哪一个是枪	Which one is "gun"	F-4-2-16	qiang1 ("gun")	jiang1 ("ginger")
Quiet	t/th	d/t	th	t	1	Apico-alveolar	Stop	哪一个是兔	Which one is "rabbit"	M-2-1-5	tu4 ("rabbit")	du4 ("belly")
Quiet	ʈʂ/ʈʂh	zh/ch	ʈʂ	zh	0	Blade-palatal	Affricate	哪一个是追	Which one is "chase"	F-6-2-24	zhui1 ("chase")	chui1 ("to blow")
Quiet	k/kh	g/k	kh	k	1	Velar	Stop	哪一个是咳	Which one is "cough"	M-3-1-9	ke2 ("cough")	ge2 ("grid")
Quiet	k/kh	g/k	k	g	0	Velar	Stop	哪一个是狗	Which one is "dog"	F-3-2-12	gou3 ("dog")	kou3 ("mouth")
Quiet	ʈʂ/ʈʂh	zh/ch	ʈʂh	ch	1	Blade-palatal	Affricate	哪一个是穿	Which one is "wear"	M-6-2-23	chuan1 ("wear")	zhuan1 ("brick")
Quiet	t/th	d/t	t	d	0	Apico-alveolar	Stop	哪一个是滴	Which one is "drip"	F-2-1-6	di1 ("drip")	ti1 ("to kick")
Quiet	tɕ/tɕh	j/q	tɕh	q	1	Dorso-palatal	Affricate	哪一个是七	Which one is "seven"	M-4-1-13	qi1 ("seven")	ji1 ("chicken")
Quiet	p/ph	b/p	p	b	0	Bilabial	Stop	哪一个是鼻	Which one is "nose"	F-1-1-2	bi2 ("nose")	pi2 ("peel")
Quiet	ʈʂ/ʈʂh	zh/ch	ʈʂh	ch	1	Blade-palatal	Affricate	哪一个是尺	Which one is "ruler"	M-6-1-21	chi3 ("ruler")	zhi3 ("paper")
Quiet	t/th	d/t	t	d	0	Apico-alveolar	Stop	哪一个是点	Which one is "dot"	F-2-2-8	dian3 ("dot")	tian3 ("to lick")
Quiet	tɕ/tɕh	j/q	tɕ	j	0	Dorso-palatal	Affricate	哪一个是金	Which one is "gold"	M-4-2-15	jin1 ("gold")	qin1 ("to kiss")
Quiet	p/ph	b/p	p	b	0	Bilabial	Stop	哪一个是棒	Which one is "stick"	F-1-2-4	bang4 ("stick")	pang4 ("fat")
Noise	ʦ/ʦh	z/c	ʦh	c	1	Blade-alveolar	Affricate	哪一个是草	Which one is "grass"	M-5-2-19	cao3 ("grass")	zao3 ("jujube")
Noise	tɕ/tɕh	j/q	tɕ	j	0	Dorso-palatal	Affricate	哪一个是举	Which one is "raise"	F-4-1-14	ju3 ("raise")	qu3 ("to pick up")
Noise	p/ph	b/p	ph	p	1	Bilabial	Stop	哪一个是牌	Which one is "card"	M-1-2-3	pai2 ("card")	bai2 ("white")
Noise	k/kh	g/k	k	g	0	Velar	Stop	哪一个是菇	Which one is "mushroom"	F-3-1-10	gu1 ("mushroom")	ku1 ("to cry")
Noise	ʦ/ʦh	z/c	ʦh	c	1	Blade-alveolar	Affricate	哪一个是刺	Which one is "thorn"	M-5-1-17	ci4 ("thorn")	zi4 ("character")
Noise	ʦ/ʦh	z/c	ʦ	z	0	Blade-alveolar	Affricate	哪一个是扎	Which one is "prick"	F-5-1-18	za1 ("prick")	ca1 ("to wipe")
Noise	t/th	d/t	th	t	1	Apico-alveolar	Stop	哪一个是碳	Which one is "carbon"	M-2-2-7	tan4 ("carbon")	dan4 ("egg")
Noise	ʈʂ/ʈʂh	zh/ch	ʈʂ	zh	0	Blade-palatal	Affricate	哪一个是炸	Which one is "fry" (as in fried chicken)	F-6-1-22	zha2 ("fry" as in fried chicken)	cha2 ("tea")
Noise	p/ph	b/p	ph	p	1	Bilabial	Stop	哪一个是趴	Which one is "lie flat"	M-1-1-1	pa1 ("lie flat")	ba1 ("eight")
Noise	ʦ/ʦh	z/c	ʦ	z	0	Blade-alveolar	Affricate	哪一个是坐	Which one is "sit"	F-5-2-20	zuo4 ("sit")	cuo4 ("wrong")
Noise	k/kh	g/k	kh	k	1	Velar	Stop	哪一个是夸	Which one is "praise"	M-3-2-11	kua1 ("praise")	gua1 ("melon")
Noise	tɕ/tɕh	j/q	tɕh	q	1	Dorso-palatal	Affricate	哪一个是枪	Which one is "gun"	F-4-2-16	qiang1 ("gun")	jiang1 ("ginger")
Noise	t/th	d/t	th	t	1	Apico-alveolar	Stop	哪一个是兔	Which one is "rabbit"	M-2-1-5	tu4 ("rabbit")	du4 ("belly")
Noise	ʈʂ/ʈʂh	zh/ch	ʈʂ	zh	0	Blade-palatal	Affricate	哪一个是追	Which one is "chase"	F-6-2-24	zhui1 ("chase")	chui1 ("to blow")
Noise	k/kh	g/k	kh	k	1	Velar	Stop	哪一个是咳	Which one is "cough"	M-3-1-9	ke2 ("cough")	ge2 ("grid")
Noise	k/kh	g/k	k	g	0	Velar	Stop	哪一个是狗	Which one is "dog"	F-3-2-12	gou3 ("dog")	kou3 ("mouth")
Noise	ʈʂ/ʈʂh	zh/ch	ʈʂh	ch	1	Blade-palatal	Affricate	哪一个是穿	Which one is "wear"	M-6-2-23	chuan1 ("wear")	zhuan1 ("brick")
Noise	t/th	d/t	t	d	0	Apico-alveolar	Stop	哪一个是滴	Which one is "drip"	F-2-1-6	di1 ("drip")	ti1 ("to kick")
Noise	tɕ/tɕh	j/q	tɕh	q	1	Dorso-palatal	Affricate	哪一个是七	Which one is "seven"	M-4-1-13	qi1 ("seven")	ji1 ("chicken")
Noise	p/ph	b/p	p	b	0	Bilabial	Stop	哪一个是鼻	Which one is "nose"	F-1-1-2	bi2 ("nose")	pi2 ("peel")
Noise	ʈʂ/ʈʂh	zh/ch	ʈʂh	ch	1	Blade-palatal	Affricate	哪一个是尺	Which one is "ruler"	M-6-1-21	chi3 ("ruler")	zhi3 ("paper")
Noise	t/th	d/t	t	d	0	Apico-alveolar	Stop	哪一个是点	Which one is "dot"	F-2-2-8	dian3 ("dot")	tian3 ("to lick")
Noise	tɕ/tɕh	j/q	tɕ	j	0	Dorso-palatal	Affricate	哪一个是金	Which one is "gold"	M-4-2-15	jin1 ("gold")	qin1 ("to kiss")
Noise	p/ph	b/p	p	b	0	Bilabial	Stop	哪一个是棒	Which one is "stick"	F-1-2-4	bang4 ("stick")	pang4 ("fat")
